# Supplementary material for: Can work-unit social capital buffer the association between workplace violence and long-term sickness absence? A prospective cohort study of healthcare employees
Source: Springer Nature journal article supplement (doi:10.1007/s00420-019-01484-7), 2019-11-18
Supplement: MOESM1 [file 17401200]

**Title: Can work-unit social capital buffer the association between workplace violence and long-term sickness absence? A prospective cohort study of healthcare employees**

**Journal:** International Archives of Occupational and Environmental Health

***Corresponding author:* Eszter Török**

Department of Public Health, University of Copenhagen, Denmark

Copenhagen Stress Research Center, Copenhagen, Denmark

Email: [eszt@sund.ku.dk](mailto:eszt@sund.ku.dk)

***Co-authors:***

**Naja Hulvej Rod**

**Annette Kjær Ersbøll**

**Johan Høy Jensen**

**Reiner Rugulies**

**Alice Jessie Clark**

Appendix 1: Eight items of the social capital scale covering elements of trust, justice and collaboration

To what degree:

…does the management trust the employees to do their work well? (7)a

…do you trust the information that comes from the management? (7)

…is the work distributed fairly? (7)

…are conflicts resolved in a fair way? (7)

…is your staff group respected by the other staff groups at the workplace? (5)b

…do you get help and support from your colleagues when needed? (5)

…do you and your colleagues take responsibility for a nice atmosphere and tone of communication? (5)

…are you and your colleagues good at coming up with suggestions for improving work procedures? (5)

aResponse categories on a 7-point Likert scale (7): 1=never/hardly ever to 7=to a very high degree

bResponse categories on a 5-point Likert scale (5): 1=not at all to 5=to a very high degree
