# Supplementary material for: Can work-unit social capital buffer the association between workplace violence and long-term sickness absence? A prospective cohort study of healthcare employees
Source: Springer Nature journal article supplement (doi:10.1007/s00420-019-01484-7), 2019-11-18
Supplement: MOESM4 [file 17401200]

**Title: Can work-unit social capital buffer the association between workplace violence and long-term sickness absence? A prospective cohort study of healthcare employees**

**Journal:** International Archives of Occupational and Environmental Health

***Corresponding author:* Eszter Török**

Department of Public Health, University of Copenhagen, Denmark

Copenhagen Stress Research Center, Copenhagen, Denmark

Email: [eszt@sund.ku.dk](mailto:eszt@sund.ku.dk)

***Co-authors:***

**Naja Hulvej Rod**

**Annette Kjær Ersbøll**

**Johan Høy Jensen**

**Reiner Rugulies**

**Alice Jessie Clark**

Appendix 4: Individual and joint effects of workplace violence/threats and work-unit social capital on turnover

|  | **Turnovera cases/Number of subjects** | **Multiple adjusted (OR 95% CI)b** |
| --- | --- | --- |
|  |  |  |
| **Violence/threats** |  |  |
| No | 4513/25574 | 1 (Reference) | |
| Yes | 841/4470 | 1.02 (0.93–1.12) | |
| **Work-unit social capital** |  |  | |
| Low | 1426/7500 | 1 (Reference) | |
| Medium | 2667/15004 | 0.86 (0.78–0.94) | |
| High | 1261/7540 | 0.80 (0.72–0.89) | |
| **Joint effect** |  |  |
| **No violence/threats** |  |  |
| High social capital | 1097/6754 | 1 (Reference) | | |
| Medium social capital | 2239/12693 | 1.10 (1.00–1.21) | | |
| Low social capital | 1177/6127 | 1.30 (1.16–1.46) | | |
| **Violence/threats** |  |  | | |
| High social capital | 164/786 | 1.25 (1.02–1.54) | | |
| Medium social capital | 428/2311 | 1.10 (0.95–1.27) | | |
| Low social capital | 249/1373 | 1.19  (1.00–1.42) | | |

aTurnover is defined as the termination of employment in the Capital Region of Denmark

bAdjusted for age, sex, seniority, occupational group, part-time work, work-unit size, proportion of female employees, and proportion on part-time work

P-value for multiplicative interaction: 0.06
